# Supplementary material
Source: Springer Nature journal article supplement (https://www.springermedizin.de/resource/supplementary/12911_2009_892_MOESM7_ESM.pdf/9527560)

■ Physicians

▨ Nurses

CPOE leads to more adverse drug events

CPOE increases computer dependency

CPOE leads to computer-related problems  
(software and hardware)

CPOE raises doubts about the reliability /  
completeness of data

CPOE contributes to / requires double  
documentation

CPOE increases the uncertainty in the  
pharmacotherapy

0% 10% 20% 30% 40% 50% 60% 70% 80% 90%

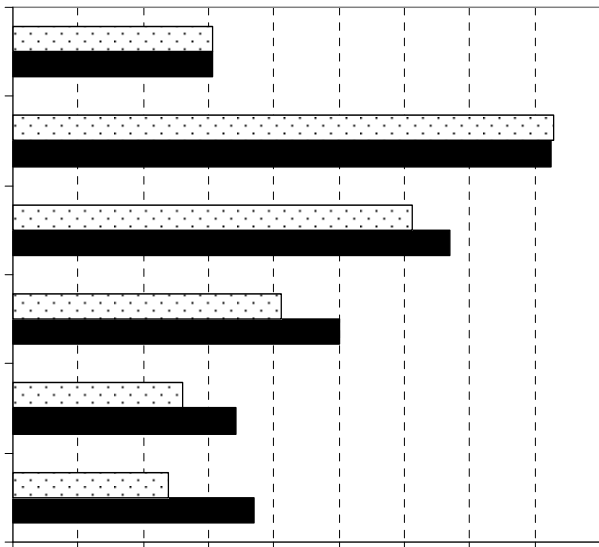

Supplement: MOESM7 [file 9527560]
